# Supplementary material for: Boosting sodium ion storage by anchoring MoO2 on vertical graphene arrays
Source: Royal Society of Chemistry journal article supplement (doi:10.1039/c8ta06232c), 2018-01-01
Supplement: c8ta06232c1.pdf [file c8ta06232c1.pdf]

## Supporting information for

### Boosting Sodium Ion Storage by Anchoring MoO<sub>2</sub> on Vertical Graphene

#### Arrays

Xinhui Xia<sup>\*a,c</sup>, Shengjue Deng,<sup>c</sup> Dong Xie,<sup>b</sup> Yadong Wang,<sup>c</sup> Shangshen Feng,<sup>\*a</sup> Jianbo Wu,<sup>a</sup>  
Jiangping Tu<sup>b</sup>

<sup>a</sup> Zhejiang Provincial Key Laboratory for Cutting Tools, Taizhou University, 318000, Zhejiang,  
China

<sup>b</sup> Guangdong Engineering and Technology Research Center for Advanced Nanomaterials, School of  
Environment and Civil Engineering, Dongguan University of Technology, Dongguan 523808, China.

<sup>c</sup> State Key Laboratory of Silicon Materials, Key Laboratory of Advanced Materials and Applications  
for Batteries of Zhejiang Province, and Department of Materials Science and Engineering, Zhejiang  
University, Hangzhou 310027, P. R. China.

<sup>d</sup> School of Engineering, Nanyang Polytechnic, 569830, Singapore

E-mail: [helloxxh@zju.edu.cn](mailto:helloxxh@zju.edu.cn); [fss@tzc.edu.cn](mailto:fss@tzc.edu.cn)

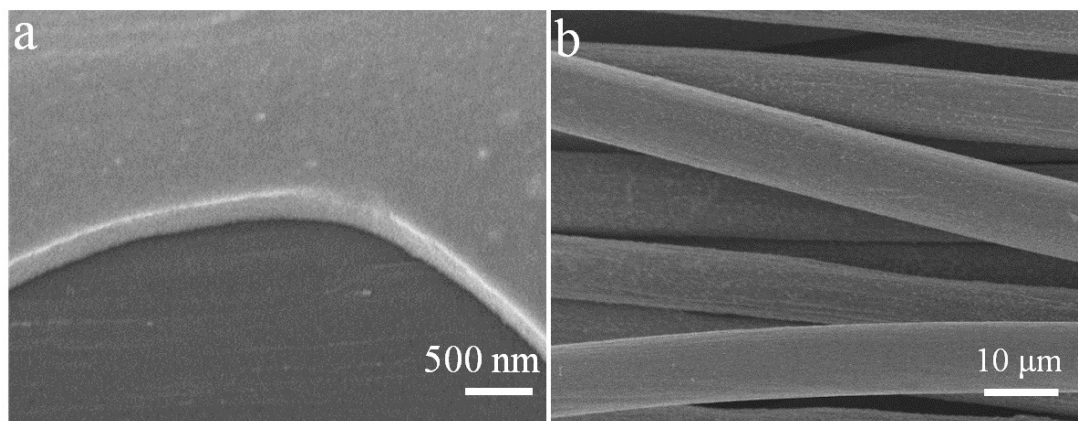

**Fig. S1** (a, b) SEM images of CFC/MoO<sub>2</sub> film.

**Table S1.** Parameter values of CFC/MoO<sub>2</sub> and VG/MoO<sub>2</sub> electrodes from the Equivalent circuit diagram at different cycle

| Electrode            |                         | R <sub>s</sub> (Ω) | R <sub>ct</sub> (Ω) | R <sub>w</sub> (Ω) | Q <sub>c</sub> (F) |
|----------------------|-------------------------|--------------------|---------------------|--------------------|--------------------|
| VG/MoO <sub>2</sub>  | 1 <sup>st</sup> cycle   | 6.25               | 96.2                | 0.068              | 0.56               |
|                      | 500 <sup>th</sup> cycle | 2.86               | 48.9                | 0.065              | 0.69               |
| CFC/MoO <sub>2</sub> | 1 <sup>st</sup> cycle   | 8.79               | 289.3               | 0.72               | 0.045              |
|                      | 500 <sup>th</sup> cycle | 5.80               | 162.5               | 0.57               | 0.089              |

R<sub>S</sub> and Q<sub>C</sub> designate the total ohmic resistance of solution and electrodes and the capacitance of the double layer. R<sub>ct</sub> and R<sub>w</sub> are designated as charge transfer resistance and Warburg resistance, reflecting the electrochemical reaction impedance related to the diameter of semicircle and the diffusion of electroactive species associated with the line slope, respectively. These parameters are calculated through the plots with ZView software and listed in Table S1.

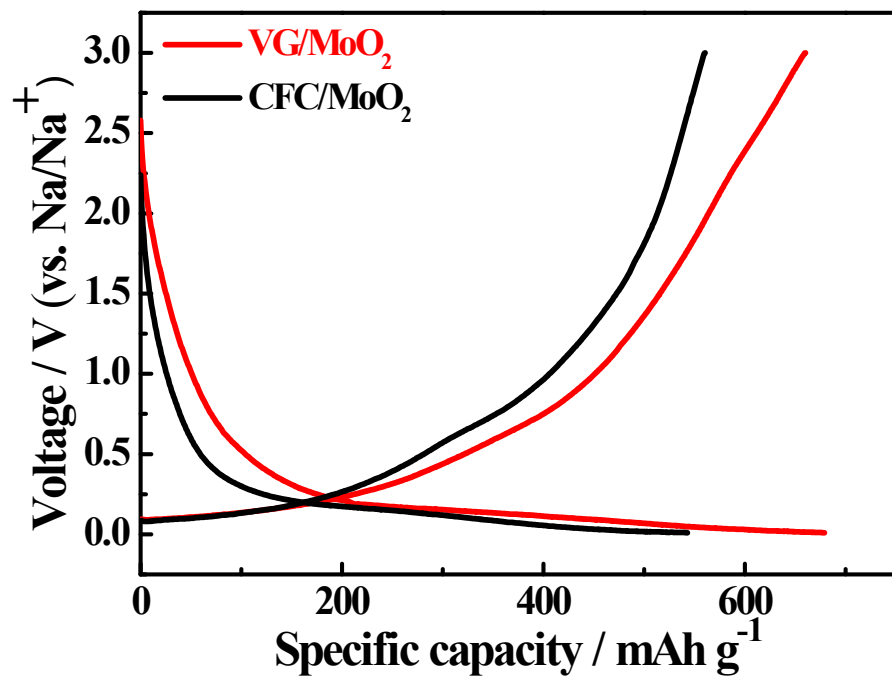

**Fig. S2** Charge/discharge curves of VG/MoO<sub>2</sub> and CFC/MoO<sub>2</sub> electrodes at the second cycle at 100 mA g<sup>-1</sup>.

**Table S2.** Cycling comparison of different MoO<sub>2</sub>-based electrodes

| Electrode                             | Capacity                                          | Cycle (Decay rate)           |
|---------------------------------------|---------------------------------------------------|------------------------------|
| MoO <sub>2</sub> /GO powder           | 483 mAh g <sup>-1</sup> at 100 mA g <sup>-1</sup> | 1.9 % per cycle <sup>1</sup> |
| MoO <sub>2</sub> /C nanosheet powder  | 367 mAh g <sup>-1</sup> at 100 mA g <sup>-1</sup> | 2.3% per cycle <sup>2</sup>  |
| TiO <sub>2</sub> @MoO <sub>2</sub> -C | 297 mAh g <sup>-1</sup> at 100 mA g <sup>-1</sup> | 0.17% per cycle <sup>3</sup> |
| MoO <sub>2</sub> /C nanoflower powder | 172 mAh g <sup>-1</sup> at 100 mA g <sup>-1</sup> | 0.06% per cycle <sup>4</sup> |
| MoO <sub>2</sub> /GO nanocomposite    | 557 mAh g <sup>-1</sup> at 100 mA g <sup>-1</sup> | 5.0 % per cycle <sup>5</sup> |
| This work                             | 678 mAh g <sup>-1</sup> at 100 mA g <sup>-1</sup> | 0.036% per cycle             |

### References

1. J. F. Huang, Z. W. Xu, L. Y. Cao, Q. L. Zhang, H. B. Ouyang and J. Y. Li, *Energy Technology*, 2015, **3**, 1108-1114.
2. H. He, Y. H. Man, J. G. Yang, J. L. Xie and M. W. Xu, *Roy. Soc. Open Sci.*, 2017, **4**.
3. C. T. Zhao, C. Yu, M. D. Zhang, H. W. Huang, S. F. Li, X. T. Han, Z. B. Liu, J. Yang, W. Xiao, J. N. Liang, X. L. Sun and J. S. Qiu, *Adv. Energy Mater.*, 2017, **7**.
4. Y. Jiang, H. C. Liang, S. V. Savilov, J. F. Ni and L. Li, *Mater. Res. Bull.*, 2017, **96**, 360-364.
5. J. X. Jiang, W. L. Yang, H. Wang, Y. Zhao, J. Guo, J. Q. Zhao, M. Beidaghi and L. J. Gao, *Electrochim. Acta*, 2017, **240**, 379-387.

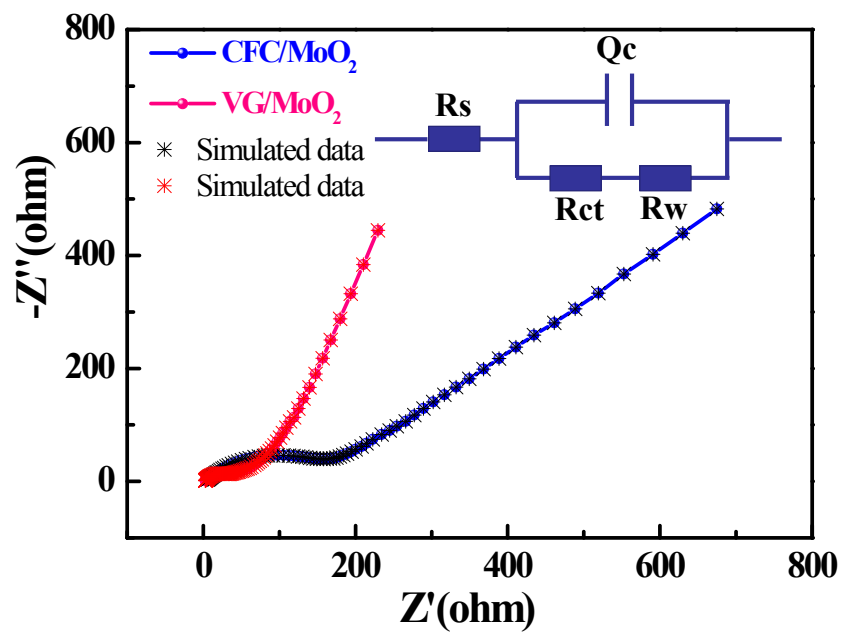

**Fig. S3** Nyquist plots of CFC/MoO<sub>2</sub> and VG/MoO<sub>2</sub> electrodes tested at discharge state at the 500th cycle at 100 mA g<sup>-1</sup>. (Equivalent circuit diagram in inset).

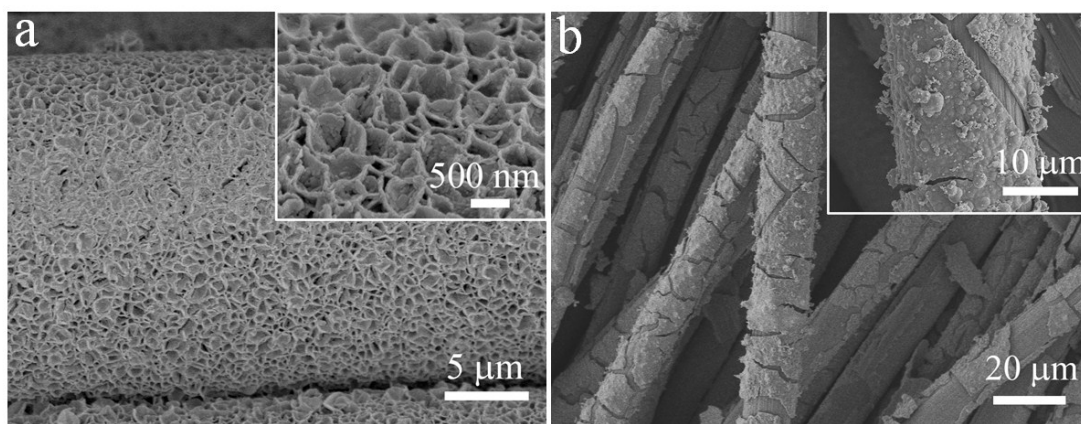

**Fig. S4** SEM images of (a) VG/MoO<sub>2</sub> and (b) CFC/MoO<sub>2</sub> electrodes after 500 cycles at 100 mA g<sup>-1</sup>.
